# Supplementary figures and images for: A further contribution to the extreme variability of quadruplex structures from oligodeoxyribonucleotides containing inversion of polarity sites in the G-tract
Source: Royal Society of Chemistry journal article supplement (doi:10.1039/b718778e), 2008-03-11

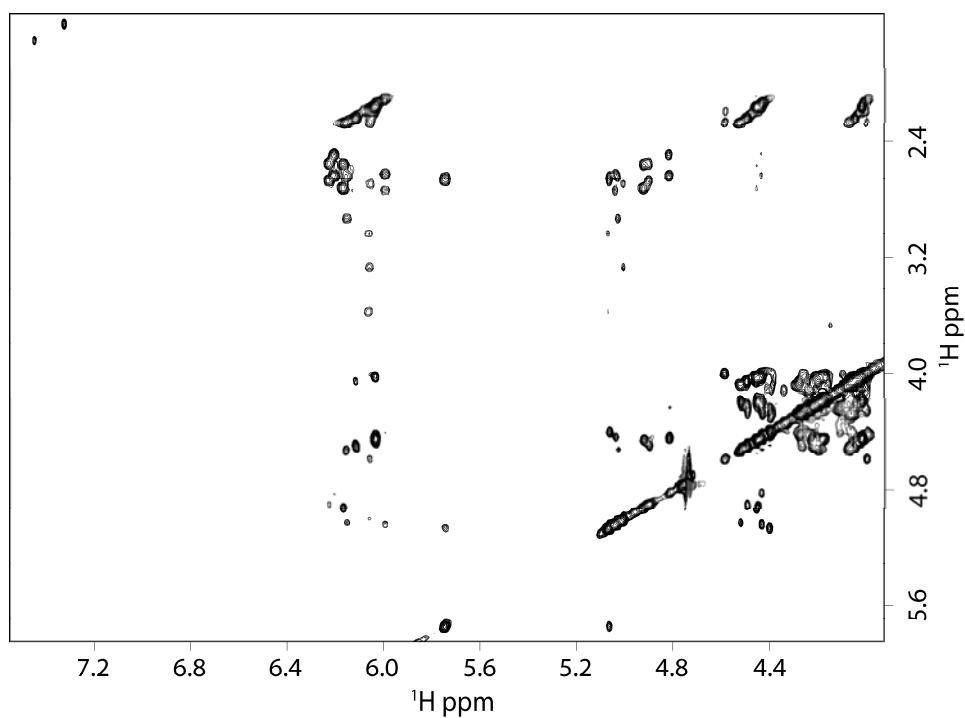

Expanded region of 2D TOCSY (700 MHz, T = 25°C) of **QS55**.

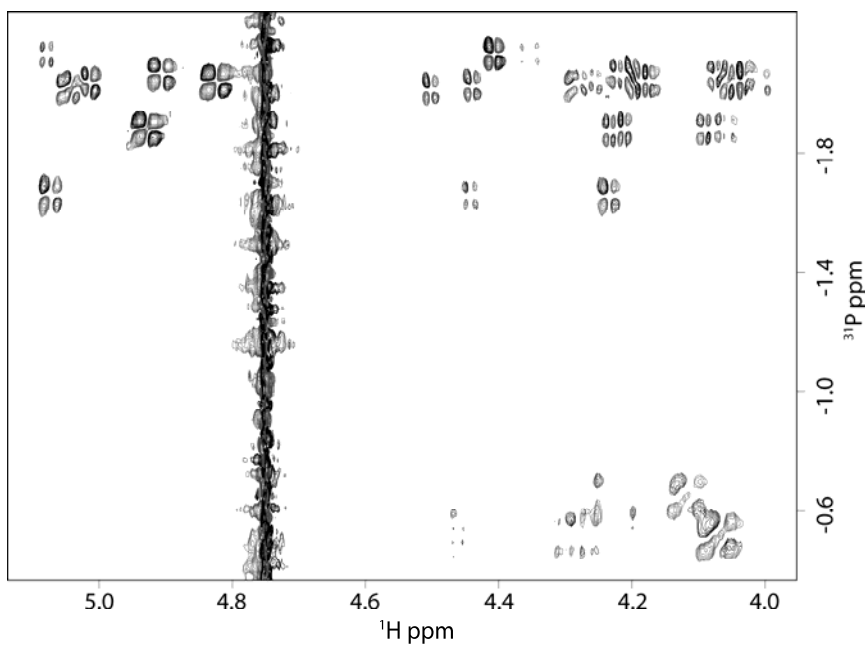

Expanded region of 2D  $^{31}\text{P}$ - $^1\text{H}$  COSY (700 MHz, T = 25°C) of **QS55**.

Supplement: b718778e.pdf [file b718778e.pdf]
